# Supplementary material
Source: PubMed Central journal article supplement (PMC11315234)
Supplement: NIHMS2012092-supplement-Supplementary_Material.pdf [file NIHMS2012092-supplement-Supplementary_Material.pdf]

Supplemental Figure 1

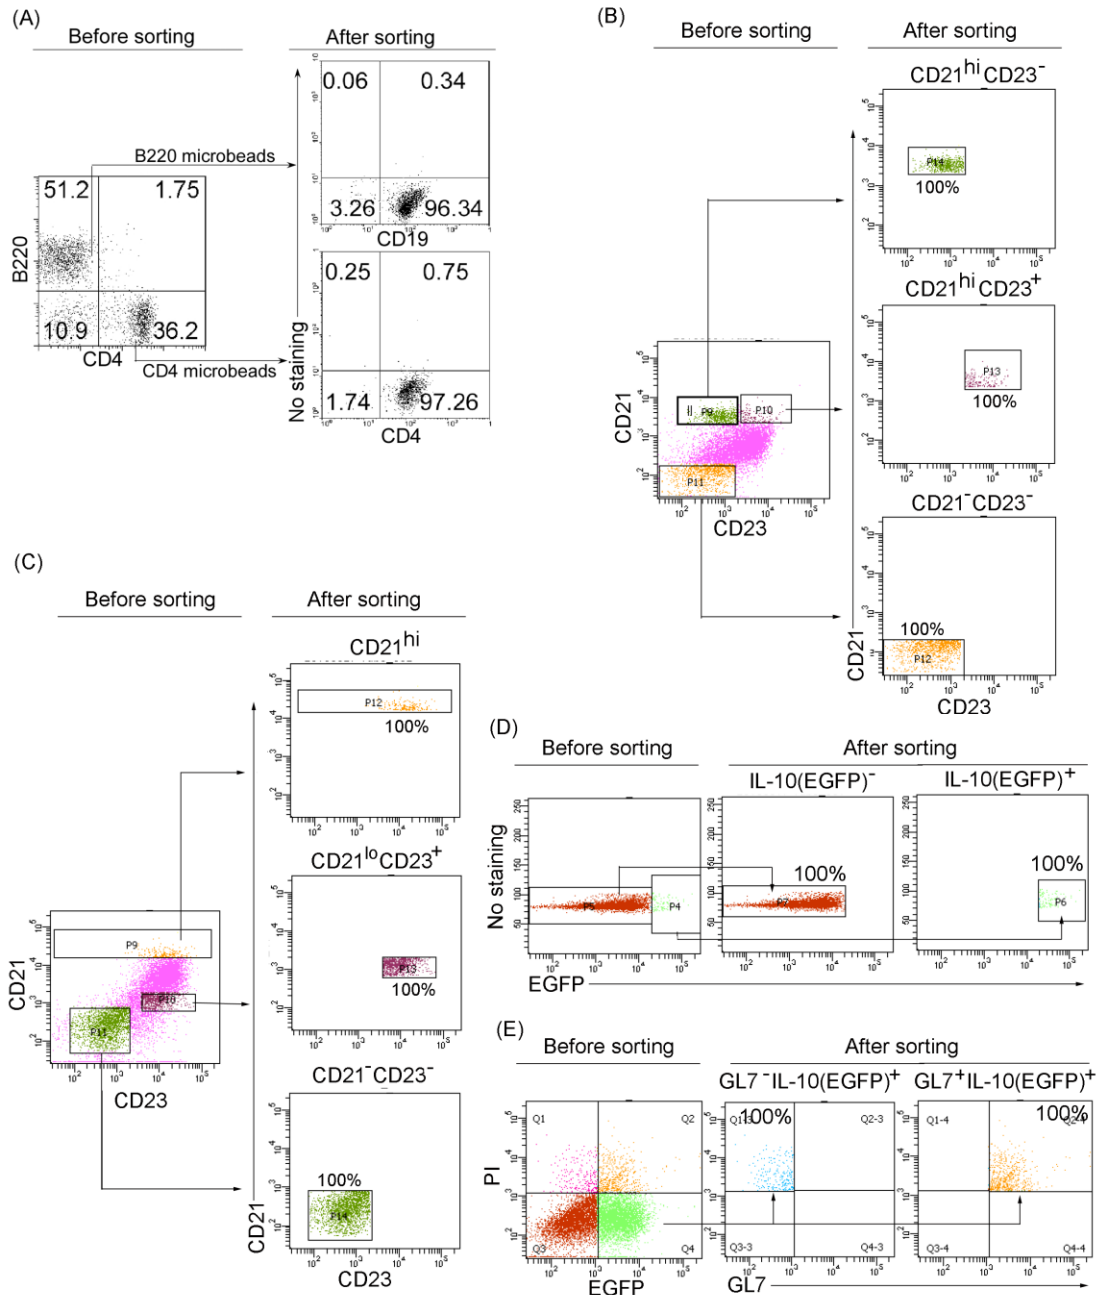

**Supplemental Fig. 1.** *The strategy for cell sorting.* (A) The purity plots for B220<sup>+</sup>B cells and CD4<sup>+</sup>T cells. Splenic B220<sup>+</sup>B and CD4<sup>+</sup>T cells were isolated using mouse B220 and CD4 microbeads, respectively. For analysis of sorted cells, B and T cells were stained with anti-mouse CD19 and CD4 antibodies. Flow cytometry was performed to determine the purification of sorted B and T cells (Purification >95%). Splenic CD21<sup>-/lo</sup>, CD21<sup>hi</sup>CD23<sup>+</sup> and CD21<sup>hi</sup>CD23<sup>-</sup> (B), CD21<sup>hi</sup>, CD21<sup>lo</sup>CD23<sup>+</sup> and

CD21<sup>-</sup>CD23<sup>-</sup> (C), GFP<sup>+</sup> (IL-10-EGFP<sup>+</sup>) and GFP<sup>-</sup> (IL-10-EGFP<sup>-</sup>) (D), GL7<sup>+</sup>IL-10(EGFP)<sup>+</sup> and GL7<sup>+</sup>IL-10(EGFP)<sup>-</sup> (E) B cells were sorted from gated on B220<sup>+</sup>B cells by FACS. Purification of sorted cells was shown.

Supplementary Figure 2

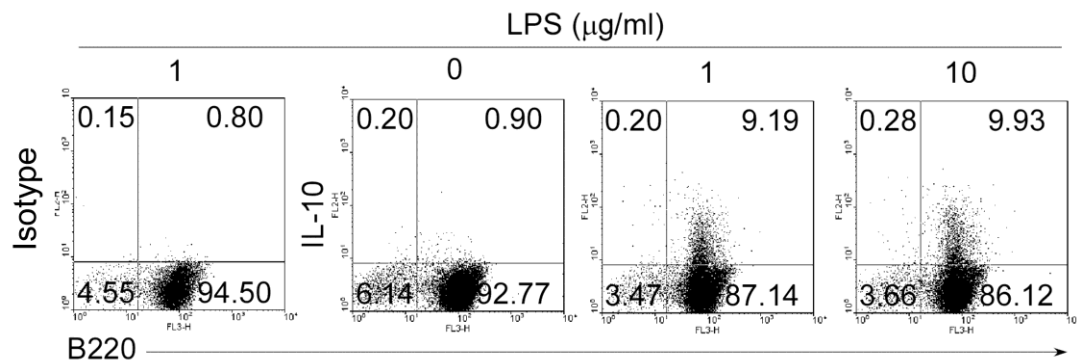

**Supplemental Fig. 2.** *Isotype control staining for IL-10 expression.* Splenic B cells were isolated from 8-week-old female C57BL/6 mice using B220 microbeads and stimulated for 3 days with 0, 1 and 10 µg/ml LPS. To visualize IL-10-competent B cells, PMA, ionomycin, brefeldin A and monensin were added to the cultures 5 h before the cells were stained for cell surface. Gated B220<sup>+</sup>B cells, the percentages of IL-10-expressing cells are shown.
